# Supplementary material
Source: PubMed Central journal article supplement (PMC4068470)
Supplement: AAC.02495-13_zac006142963so1.pdf [file AAC.02495-13_zac006142963so1.pdf]

# Supplemental materials for “Preclinical Characterization of BMS-791325, an Allosteric Inhibitor of Hepatitis C Virus NS5B Polymerase” (Lemm J, *et al.*)

## Contents

|                                                                                                                                                       |   |
|-------------------------------------------------------------------------------------------------------------------------------------------------------|---|
| Table S1. Triple Combination Using BMS-791325 ('325) With IFN $\alpha$ and Ribavirin (RBV).....                                                       | 2 |
| Table S2. Combination of BMS-791325 ('325) With the NS3 Protease Inhibitor Asunaprevir (ASV).....                                                     | 3 |
| Table S3. Combination of BMS-791325 ('325) With the NS5A Inhibitor Daclatasvir (DCV).....                                                             | 4 |
| Table S4. Combination of BMS-791325 ('325) With the Palm Site 2 NS5B Inhibitor HCV-796.....                                                           | 5 |
| Table S5. Combination of BMS-791325 ('325) With the NS5B Nucleoside Inhibitor NM-283.....                                                             | 6 |
| Table S6. Triple Combination Using BMS-791325 ('325) With the NS5A inhibitor Daclatasvir (DCV) and the NS3 Protease Inhibitor Asunaprevir (ASV) ..... | 7 |
| Database Consensus Sequences for GT 2b, 3a, 4a, 5a and 6a NS5B Proteins .....                                                                         | 8 |

**Table S1. Triple Combination Using BMS-791325 ('325) With IFN $\alpha$  and Ribavirin (RBV)**

| Expt | '325<br>EC <sub>50</sub> , nM | IFN $\alpha$<br>EC <sub>50</sub> , U/mL | RBV<br>EC <sub>50</sub> , nM | Combination Indices<br>(confidence interval) |                      |                      | Overall Result         |
|------|-------------------------------|-----------------------------------------|------------------------------|----------------------------------------------|----------------------|----------------------|------------------------|
|      |                               |                                         |                              | 50%<br>effective                             | 75%<br>effective     | 90%<br>effective     |                        |
| 1    | 4.4                           | 1.6                                     | 24566                        | 0.97<br>(0.85, 1.09)                         | 0.97<br>(0.80, 1.14) | 1.02<br>(0.74, 1.29) | Additivity             |
| 2    | 4.3                           | 7.1                                     | 45323                        | 1.04<br>(0.95, 1.13)                         | 0.95<br>(0.84, 1.06) | 0.88<br>(0.73, 1.04) | Additivity             |
| 3    | 4.1                           | 9.1                                     | 53362                        | 0.93<br>(0.84, 1.01)                         | 0.82<br>(0.72, 0.93) | 0.76<br>(0.61, 0.91) | Additivity/<br>Synergy |

**Table S2. Combination of BMS-791325 ('325) With the NS3 Protease Inhibitor Asunaprevir (ASV)**

| Expt | '325<br>EC <sub>50</sub> , uM | ASV<br>EC <sub>50</sub> , nM | ASV:'325 | Combination Indices<br>(confidence interval) |                      |                      | Overall Result |
|------|-------------------------------|------------------------------|----------|----------------------------------------------|----------------------|----------------------|----------------|
|      |                               |                              |          | 50%<br>effective                             | 75%<br>effective     | 90%<br>effective     |                |
| 1    | 0.003                         | 0.7                          | 1:1      | 1.05<br>(0.98, 1.12)                         | 0.96<br>(0.86, 1.06) | 0.88<br>(0.74, 1.02) | Additivity     |
|      |                               |                              | 2.5:1    | 0.95<br>(0.87, 1.03)                         | 0.99<br>(0.88, 1.11) | 1.04<br>(0.84, 1.23) | Additivity     |
|      |                               |                              | 1:2.5    | 0.98<br>(0.91, 1.06)                         | 0.99<br>(0.88, 1.09) | 0.99<br>(0.82, 1.15) | Additivity     |
| 2    | 0.003                         | 0.7                          | 1:1      | 1.04<br>(0.96, 1.12)                         | 0.95<br>(0.84, 1.05) | 0.86<br>(0.71, 1.01) | Additivity     |
|      |                               |                              | 2.5:1    | 0.97<br>(0.89, 1.05)                         | 1.00<br>(0.88, 1.12) | 1.03<br>(0.84, 1.22) | Additivity     |
|      |                               |                              | 1:2.5    | 0.97<br>(0.89, 1.05)                         | 0.98<br>(0.87, 1.10) | 1.00<br>(0.82, 1.18) | Additivity     |
| 3    | 0.004                         | 0.9                          | 1:1      | 1.00<br>(0.92, 1.07)                         | 0.96<br>(0.86, 1.06) | 0.92<br>(0.77, 1.08) | Additivity     |
|      |                               |                              | 2.5:1    | 1.07<br>(1.00, 1.14)                         | 1.00<br>(0.91, 1.09) | 0.93<br>(0.80, 1.07) | Additivity     |
|      |                               |                              | 1:2.5    | 1.02<br>(0.93, 1.11)                         | 1.03<br>(0.90, 1.16) | 1.04<br>(0.84, 1.24) | Additivity     |

**Table S3. Combination of BMS-791325 ('325) With the NS5A Inhibitor Daclatasvir (DCV)**

| Expt | DCV<br>EC <sub>50</sub> , nM | '325<br>EC <sub>50</sub> , uM | '325:DCV | Combination Indices<br>(confidence interval) |                      |                      | Overall Result          |
|------|------------------------------|-------------------------------|----------|----------------------------------------------|----------------------|----------------------|-------------------------|
|      |                              |                               |          | 50%<br>effective                             | 75%<br>effective     | 90%<br>effective     |                         |
| 1    | 0.010                        | 0.015                         | 1:1      | 0.88<br>(0.81, 0.95)                         | 0.83<br>(0.73, 0.93) | 0.79<br>(0.64, 0.94) | Synergy                 |
|      |                              |                               | 1:2.5    | 0.80<br>(0.72, 0.88)                         | 0.79<br>(0.68, 0.89) | 0.78<br>(0.62, 0.94) | Synergy                 |
|      |                              |                               | 2.5:1    | 0.97<br>(0.90, 1.04)                         | 0.97<br>(0.87, 1.07) | 0.96<br>(0.80, 1.13) | Additivity              |
| 2    | 0.007                        | 0.013                         | 1:1      | 0.81<br>(0.76, 0.86)                         | 0.88<br>(0.80, 0.95) | 0.95<br>(0.82, 1.08) | Synergy /<br>Additivity |
|      |                              |                               | 1:2.5    | 0.66<br>(0.62, 0.70)                         | 0.65<br>(0.59, 0.72) | 0.65<br>(0.55, 0.75) | Synergy                 |
|      |                              |                               | 2.5:1    | 0.95<br>(0.88, 1.01)                         | 0.98<br>(0.90, 1.07) | 1.02<br>(0.88, 1.16) | Additivity              |
| 3    | 0.006                        | 0.010                         | 1:1      | 0.85<br>(0.77, 0.93)                         | 0.88<br>(0.77, 0.98) | 0.90<br>(0.73, 1.08) | Synergy /<br>Additivity |
|      |                              |                               | 1:2.5    | 0.84<br>(0.79, 0.90)                         | 0.81<br>(0.72, 0.91) | 0.79<br>(0.64, 0.93) | Synergy                 |
|      |                              |                               | 2.5:1    | 0.92<br>(0.85, 0.99)                         | 0.92<br>(0.82, 1.01) | 0.92<br>(0.77, 1.06) | Synergy /<br>Additivity |

**Table S4. Combination of BMS-791325 ('325) With the Palm Site 2 NS5B Inhibitor HCV-796**

| Expt | '325<br>EC <sub>50</sub> , uM | HCV-796<br>EC <sub>50</sub> , uM | HCV-<br>796:'325 | Combination Indices<br>(confidence interval) |                      |                      | Overall Result |
|------|-------------------------------|----------------------------------|------------------|----------------------------------------------|----------------------|----------------------|----------------|
|      |                               |                                  |                  | 50%<br>effective                             | 75%<br>effective     | 90%<br>effective     |                |
| 1    | 0.005                         | 0.013                            | 1:1              | 0.81<br>(0.77, 0.85)                         | 0.76<br>(0.70, 0.81) | 0.70<br>(0.63, 0.78) | Synergy        |
|      |                               |                                  | 2.5:1            | 0.82<br>(0.78, 0.87)                         | 0.79<br>(0.73, 0.84) | 0.75<br>(0.66, 0.83) | Synergy        |
|      |                               |                                  | 1:2.5            | 0.88<br>(0.84, 0.91)                         | 0.78<br>(0.73, 0.84) | 0.70<br>(0.63, 0.78) | Synergy        |
| 2    | 0.004                         | 0.008                            | 1:1              | 0.79<br>(0.75, 0.83)                         | 0.66<br>(0.61, 0.71) | 0.55<br>(0.48, 0.62) | Synergy        |
|      |                               |                                  | 2.5:1            | 0.79<br>(0.75, 0.84)                         | 0.70<br>(0.65, 0.76) | 0.62<br>(0.54, 0.70) | Synergy        |
|      |                               |                                  | 1:2.5            | 0.76<br>(0.72, 0.81)                         | 0.69<br>(0.64, 0.75) | 0.63<br>(0.55, 0.71) | Synergy        |
| 3    | 0.003                         | 0.011                            | 1:1              | 0.83<br>(0.76, 0.90)                         | 0.73<br>(0.64, 0.82) | 0.64<br>(0.52, 0.77) | Synergy        |
|      |                               |                                  | 2.5:1            | 0.74<br>(0.68, 0.80)                         | 0.71<br>(0.63, 0.80) | 0.69<br>(0.57, 0.82) | Synergy        |
|      |                               |                                  | 1:2.5            | 0.88<br>(0.80, 0.95)                         | 0.84<br>(0.74, 0.93) | 0.80<br>(0.66, 0.94) | Synergy        |

**Table S5. Combination of BMS-791325 ('325) With the NS5B Nucleoside Inhibitor NM-283**

| Expt | '325<br>EC <sub>50</sub> , uM | NM-283<br>EC <sub>50</sub> , uM | NM-<br>283:'325 | Combination Indices<br>(confidence interval) |                      |                      | Overall Result          |
|------|-------------------------------|---------------------------------|-----------------|----------------------------------------------|----------------------|----------------------|-------------------------|
|      |                               |                                 |                 | 50%<br>effective                             | 75%<br>effective     | 90%<br>effective     |                         |
| 1    | 0.003                         | 1.2                             | 1:1             | 0.95<br>(0.85, 1.05)                         | 0.88<br>(0.75, 1.01) | 0.81<br>(0.63, 1.00) | Additivity /<br>Synergy |
|      |                               |                                 | 2.5:1           | 0.77<br>(0.68, 0.86)                         | 0.84<br>(0.70, 0.98) | 0.92<br>(0.68, 1.15) | Synergy /<br>Additivity |
|      |                               |                                 | 1:2.5           | 0.80<br>(0.71, 0.89)                         | 0.82<br>(0.69, 0.95) | 0.85<br>(0.64, 1.06) | Synergy /<br>Additivity |
| 2    | 0.003                         | 1.3                             | 1:1             | 0.53<br>(0.47, 0.59)                         | 0.59<br>(0.50, 0.69) | 0.67<br>(0.50, 0.83) | Synergy                 |
|      |                               |                                 | 2.5:1           | 0.44<br>(0.39, 0.50)                         | 0.53<br>(0.44, 0.62) | 0.64<br>(0.47, 0.80) | Synergy                 |
|      |                               |                                 | 1:2.5           | 0.43<br>(0.37, 0.49)                         | 0.59<br>(0.47, 0.70) | 0.80<br>(0.56, 1.04) | Synergy /<br>Additivity |
| 3    | 0.003                         | 1.0                             | 1:1             | 0.76<br>(0.68, 0.84)                         | 0.76<br>(0.65, 0.87) | 0.75<br>(0.58, 0.93) | Synergy                 |
|      |                               |                                 | 2.5:1           | 0.77<br>(0.69, 0.85)                         | 0.75<br>(0.64, 0.86) | 0.73<br>(0.57, 0.90) | Synergy                 |
|      |                               |                                 | 1:2.5           | 0.60<br>(0.54, 0.66)                         | 0.63<br>(0.54, 0.71) | 0.66<br>(0.52, 0.80) | Synergy                 |

**Table S6. Triple Combination Using BMS-791325 ('325) With the NS5A inhibitor Daclatasvir (DCV) and the NS3 Protease Inhibitor Asunaprevir (ASV)**

| Expt | '325<br>EC <sub>50</sub> , nM | DCV<br>EC <sub>50</sub> , nM | ASV<br>EC <sub>50</sub> , nM | Combination Indices<br>(confidence interval) |                      |                      | Overall Result |
|------|-------------------------------|------------------------------|------------------------------|----------------------------------------------|----------------------|----------------------|----------------|
|      |                               |                              |                              | 50%<br>effective                             | 75%<br>effective     | 90%<br>effective     |                |
| 1    | 5.4                           | 0.003                        | 1.2                          | 1.00<br>(0.92, 1.08)                         | 1.05<br>(0.93, 1.17) | 1.11<br>(0.91, 1.30) | Additivity     |
| 2    | 2.3                           | 0.002                        | 0.7                          | 0.93<br>(0.85, 1.01)                         | 1.01<br>(0.88, 1.14) | 1.10<br>(0.88, 1.31) | Additivity     |
| 3    | 2.8                           | 0.002                        | 0.8                          | 1.01<br>(0.94, 1.08)                         | 0.97<br>(0.88, 1.06) | 0.93<br>(0.79, 1.07) | Additivity     |

'325, BMS-791325; DCV, daclatasvir; ASV, asunaprevir.

## Database Consensus Sequences for GT 2b, 3a, 4a, 5a and 6a NS5B Proteins

### GT-2b

MSTSYSWTGALITPCGPEEEKLPINPLSNLSLMRFHNKVYSTTSRSASQRAKKVTFDRVQVLDTHYDSVLQDVKRA  
ASKVSARLLSVEEACALTPPHSAKSRYGFGAKEVRSLRRAVNHRSVWEDLLEDQHTPIDTTIMAKNEVFCVDPA  
KGGKKSARLIVYDGLGVRVCEKMALYDIAQKLPKAVMGSSYGFQYSPAERVDFLLKAWGSKKDPMGFSYDTRCF  
DSTVTERDIRTEESIQACSLPQEARTVIHSLTERLYVGGPMINSKGQSCGYRRCRASGVFTTSMGNTMTCYIKAL  
AACKAAGIVDPIMLVCGDDLVIIVISESQGNEEDERNLRAFTEAMTRYSAPPGDLPRPEYDLELITSCSSNVSVLDP  
RGRRRYYLTRDPTTPISSRAAWETVRHSPVNSWLGNIQYAPTIWVRMVIMTHFFAILLAQDTLNQNLNFEMYGAVY  
SVNPLDLPALIERIHGLDAFSLHTYSPHELRSVAATLRKLGAPPLRAWKSRARAVRASLIAQGGGRASVCGRYLFNW  
AVRTKCLKLTPLPEASRLDLSG WFTVGAGGGDIFHSVSHARPRLLL

### GT-3a

MSMSYSWTGALITPCSAEEEEKLPISPLSNLSLLRHHNLVYSTSSRSASQRQKKVTFDRLQVLDDHYKTVLQEVKER  
ASRVKARTLTIEEACALVPPHSARSKFGYSAKDVRSLSSKAINQIRSVWEDLLEDTTTTPIPTTIMAKNEVFCVDPTK  
GGRKPTRLIVYDGLGVRVCEKRALYDVIQKLSIETMGPAYGFQYSPQQRVERLLKMWTSKKTPLGFSYDTRCFDS  
TVTEQDIRVEEIIYQCCNLEPEARKVISSLTERLYCGGPMFNSKGAQCCGYRRCRASGVLPSTFGNTITCYIKATAA  
ARAAGLRNPEFLVCGDDLVIIVAESDGVDEDRATLRAFTEAMTRYSAPPGDAPQPTYDLELITSCSSNVSVARDDK  
GKRYYYLTRDATTPLARAAWETARHTPVNSWLGNIIMYAPTIWVRMVMMTHFFSILQSQEILDRPLDFEMYGATYS  
VTPLDLPALIERLHGLSAFTLHSPVELNRVAGTLRKLGCPLRAWRHRARAVRAKLIQGGKAKICGLYLFNWA  
VRTKTKLTPLPATGQLDLSSWFTVGVGNDIYHSVSRARTRYLL

### GT-4a

MSMSYSWTGALVTPCAAEEKLPISPLSNLSLLRHHNMVYATTTSAVTRQKKVTFDRLQVVDNHYNELTKEIKAR  
ASRVKARLLTTEEACDLTPPHSAKSKFGYGAKDVRSHSRKAINHINSVWEDLLEDNNTPIPTTIMAKNEVFAVNPA  
KGGKPARLIVYDGLGVRVCEKRALHDVINQLPKAVMGAAAGFYSPAQRVEFLLTSWKSCKTPMGFSYDTRCF  
DSTVTEKDIRTEEEVYQCCDLEPEARKVIAALTERLYVGGPMHNSKGDLCGYRRCRASGVYTTTSGNTLTTCYLKA  
TAAIKAAGLRDCTMLVCGDDLVIIVAESDGVVEDNRALRAFTEAMTRYSAPPGDAPQPAYDLELITSCSSNVSVAH  
DATGKKVYYLTRDPETPLARAAWETVRHTPVNSWLGNIIVYAPTIWVRMVLMTTHFFSILQSQEALDFDYMVG  
TYSITPLDLPALIIQRLHGLSAFTLHGYSPELNRVAGSLRKLGVPLRAWRHRARAVRAKLIQGGKAKICGIYLFN  
WAVKTKLKLTPLPAAANLDLSSWFTVGAGGGDIYHSVSHARPRYLL

### GT-5a

MSMSYSWTGALITPCSADEEKLPINPLSNLTLRHHNLVYSTSSRSAGLRQKKVTFDRLQVLDDHYREVVDKMKRL  
ASKVKARLLPLEEACGLTPPHSARSKYGYGAKEVRSLDKKALNHKGVWQDLDLSDTPIPTTIMAKNEVFAVEPS  
KGGKPARLIVYDGLGVRVCEKRALYDVAQKLPTALMGPSYGFQYSPAQRVEFLLKAWKSKKTPMAFSYDTRCF  
DSTVTEHDIMTEESIQSCDLQPEARAAIRSLTQRLYCGGPMYNSKGQCCGYRRCRASGVFTTSMGNTMTCYIK  
ALASCRAAKLRDCTLLVCGDDLVAICESQGTHEDEASLRAFTEAMTRYSAPPGDPPVPAYDLELVTSCSSNVSV  
RDASGNRVYYLTRDPQVPLARAAWETAKHSPVNSWLGNIIMYAPTLWARIVLMTTHFFSVLQSQEQLKALAFEMY  
GSVYSVTPDLPALIIQRLHGLSAFSLHSPSEINRVASCLRKLGVPLRAWRHRARAVRAKLIQGGRAAICGIYL  
FNWAVKTKRKLTPADADRLDLSSWFTVGAGGGDIYHSMSRARPRYLL

### GT-6a

MSMSYSWTGALITPCAAEEEEKLPINPLSNLSLRHHNMVYSTTSRSASLRQKKVTFDRVQVFDQHYQDVLKEIKLRA  
STVQAKLLSIEEACDLTPSHSARSKYGYGAQDVRSHASKAVNHRSVWEDLLEDSDTPIPTTIMAKNEVFCVDPSK  
GGRKPARLIVYDGLGVRVCEKMALYDVTRKLPQAVMGSAAYGFQYSPNQRVEYLLKMWRSKKVPMPGFSYDTRCF



DSTVTERDIRTENDIYQSCQLDPVARRAVSSLTERLYVGGPMVNSKGGQSCGYRRCRASGVLPTSMGNTLTCYLK  
AQAACRAANIKDCDMLVCGDDL VVICESAGVQEDTASLRAFTDAMTRY SAPPGDAPQPTYDLELITSCSSNV SVA  
HDGNGKRYYYLTRDCTT PLARAAWETARHTPVNSWLGNII MFAPTIWVRMVL MTHFFSILQSQEQLKALDFDIYG  
VTYSVSPLDLP AIIQRLHGMAAFSLHGYS PVELNRVGACLRKLGVPPLRAW RHRARAVRAKLI AQGGKAAICGKYL  
FNWAVKTKLKL TPLVSASKLDLSGWFVAGYDGGDIYHSVSQARPRLLL
